# Supplementary material for: A novel carbon quantum dot-based fluorescent nanosensor for selective detection of flumioxazin in real samples
Source: Royal Society of Chemistry journal article supplement (doi:10.1039/c7nj04358a), 2017-12-27
Supplement: c7nj04358a1.pdf [file c7nj04358a1.pdf]

## Novel carbon quantum dot fluorescence nanosensor for selective detection of flumioxazin in real samples

Snigdharani Panda, Arpita Jadav, Niranjan Panda and Sasmita Mohapatra\*

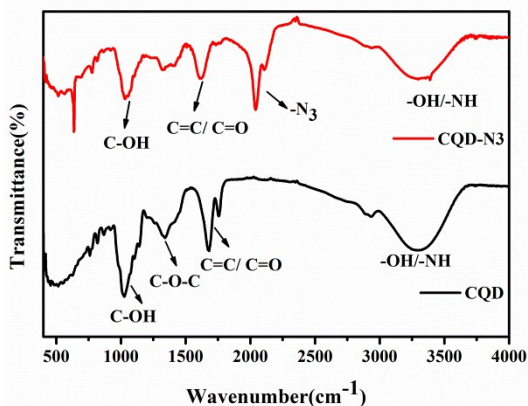

Fig S1 FTIR spectra of CQD, CQD-N<sub>3</sub>

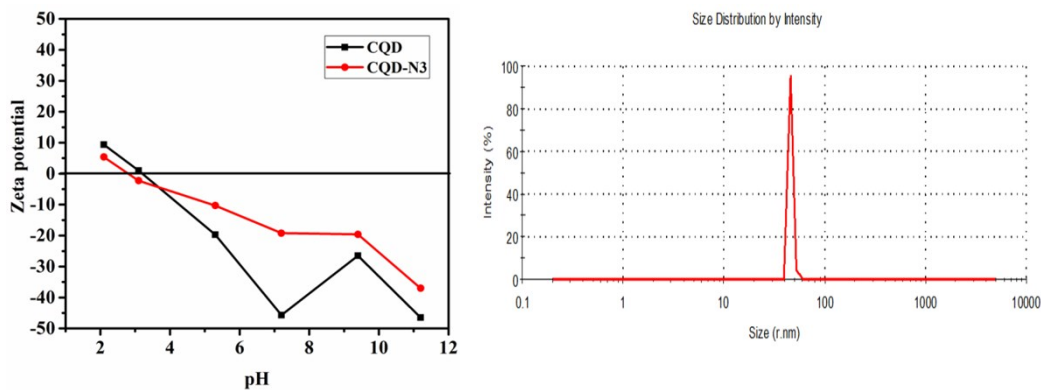

Fig S2 (a) Change in Zeta-potential of CQD and CQD-N<sub>3</sub> with pH, (b) Particle size distribution graph of CQD-N<sub>3</sub>.

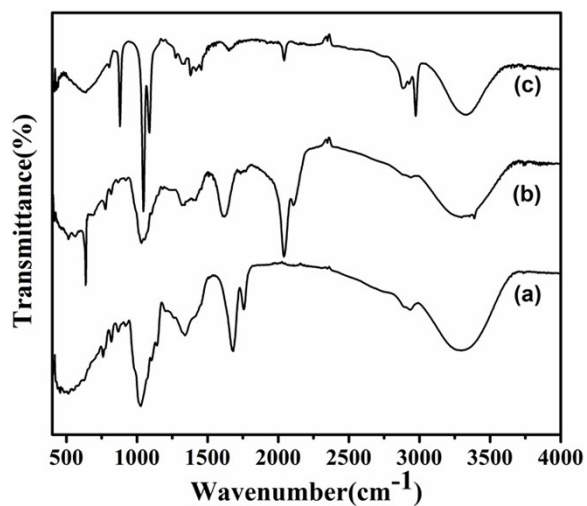

**Fig.S3** FTIR spectra of (a) CQD, (b) CQD-N<sub>3</sub>, (c) CQD-N<sub>3</sub>+Cu+AA+Flumioxazin

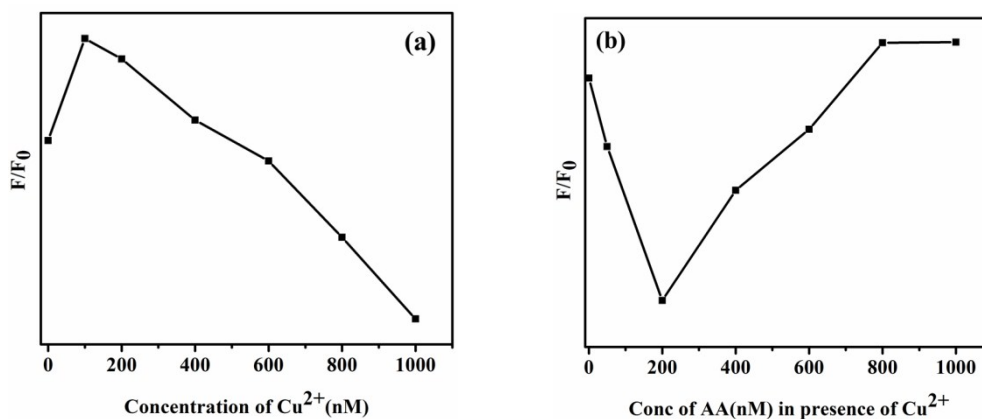

**Fig.S4** (a) Quenching effect of Cu<sup>2+</sup> on CQD-N<sub>3</sub>, (b) Regain of quenching in presence of AA

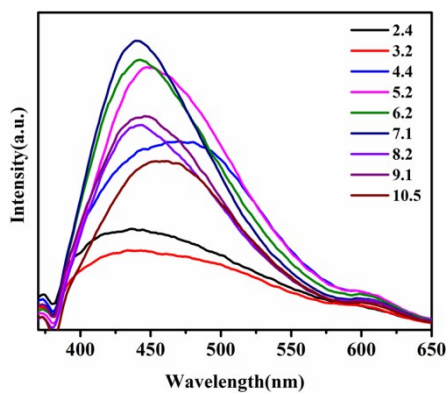

**Fig.S5** Change in intensity of the probe w.r.t. pH

Compound 1:

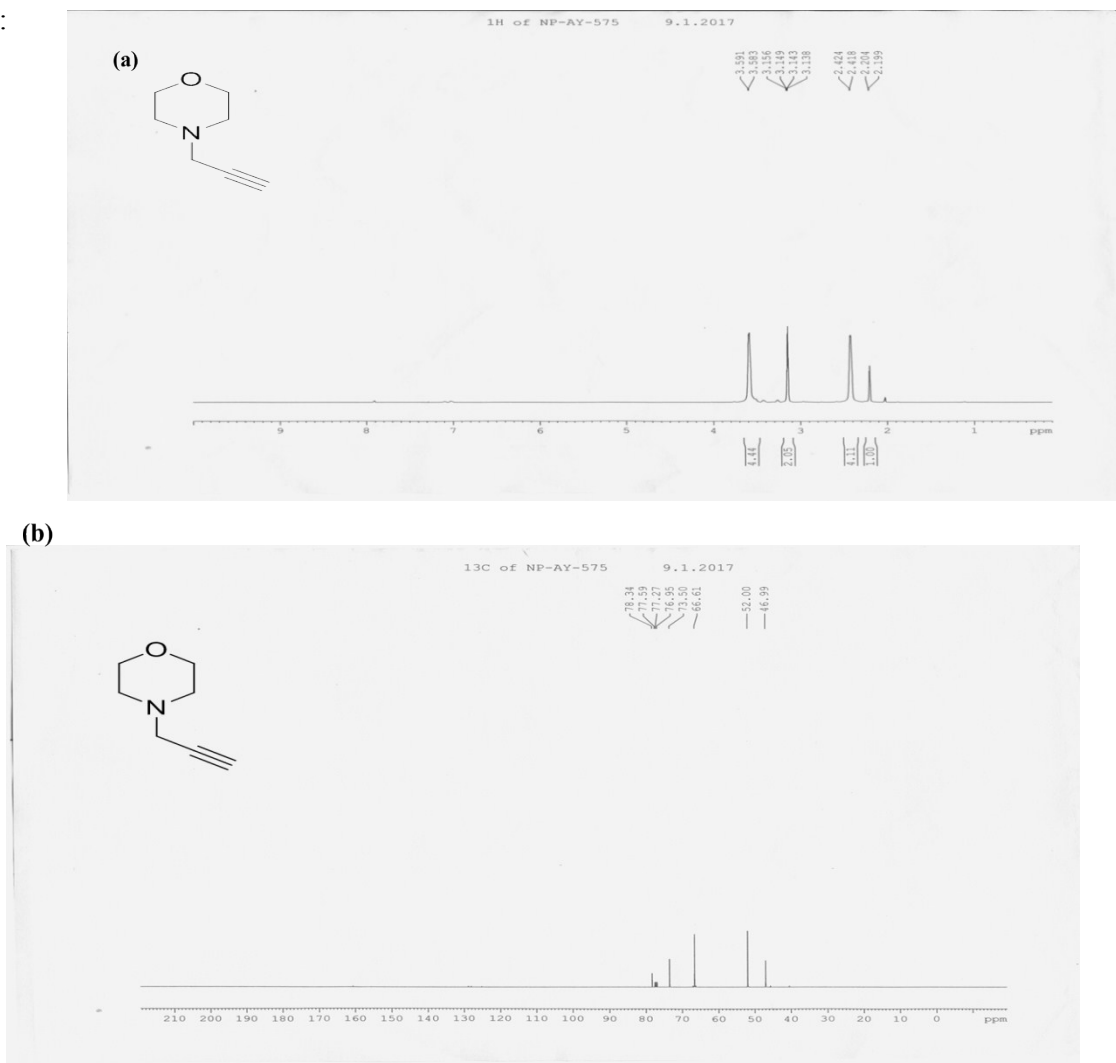

Fig.S6 (a) <sup>1</sup>H NMR spectra of compound 1, (b) <sup>13</sup>C NMR spectra compound 1

<sup>1</sup>H NMR (400 MHz, CDCl<sub>3</sub>) δ 3.57(d, *J* = 4 Hz, 4H), 3.17 – 3.11 (m, 2H), 2.40 (d, *J* = 4 Hz, 4H), 2.18 (d, *J* = 4 Hz, 1H); <sup>13</sup>C NMR (100 MHz, CDCl<sub>3</sub>) δ 78.3, 73.5, 66.6, 52.0, 46.9. IR (ATR): ν = 3278, 2862, 1673, 1456, 1297, 1109 cm<sup>-1</sup>.

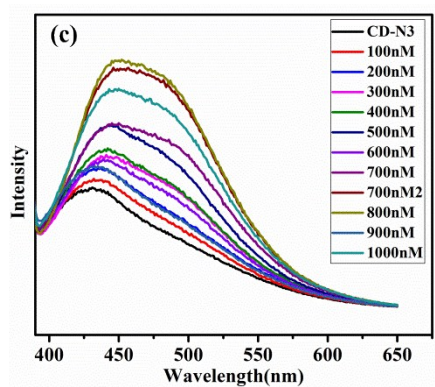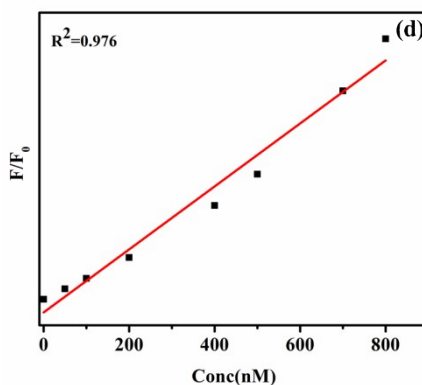

**Fig.S6** (c) PL turn on of CQD-N<sub>3</sub> with different conc. Of compound 1, (d) Linear response of compound 1 in HEPES buffer.

Comound 2:

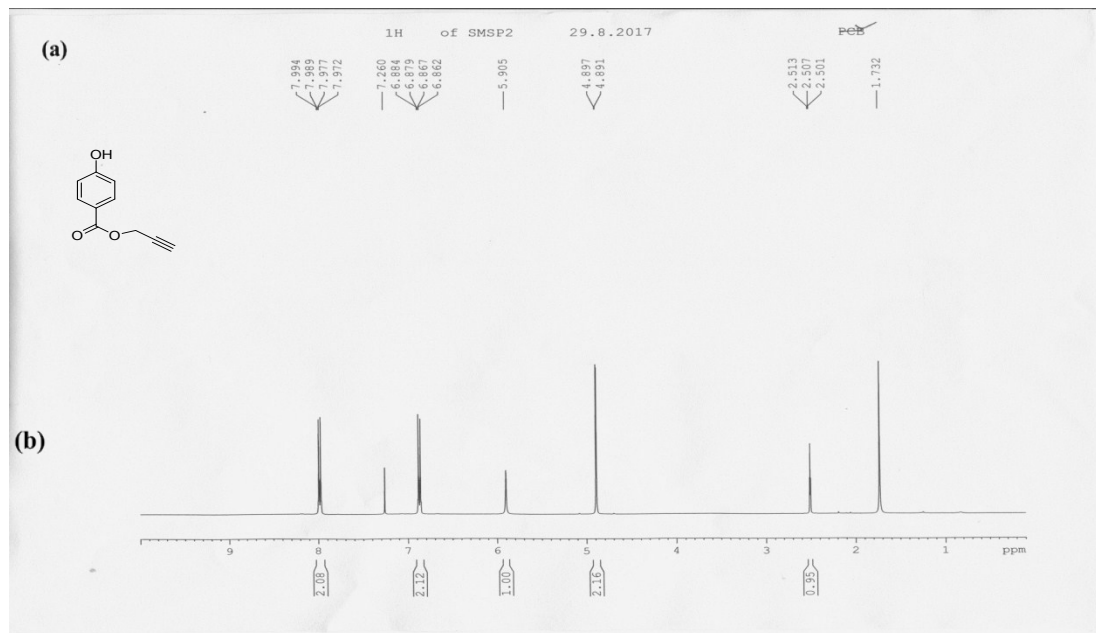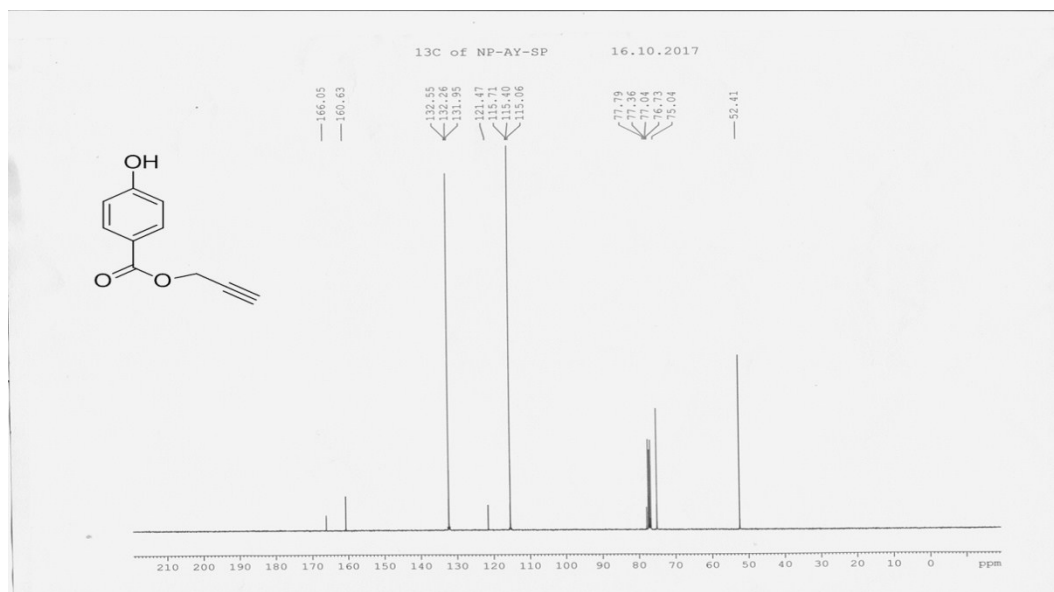

**Fig.S7** (a)  $^1\text{H}$  NMR spectra of compound 2, (b)  $^{13}\text{C}$  NMR spectra compound 2.

$^1\text{H}$  NMR (400 MHz,  $\text{CDCl}_3$ )  $\delta$  8.01 -7.95 (m, 2H), 6.90 - 6.84 (m, 2H), 5.90 (s, 1H), 4.89 (d, 2H,  $J = 2.4$  Hz), 2.50 (t, 1H);  $^{13}\text{C}$  NMR (100 MHz,  $\text{CDCl}_3$ )  $\delta$  166.03, 160.63, 132.22, 121.45, 115.38, 77.76, 74.99, 52.37. IR (ATR):  $\nu = 3337, 3268, 2119, 1693, 1604, 1446, 1099\text{ cm}^{-1}$ .

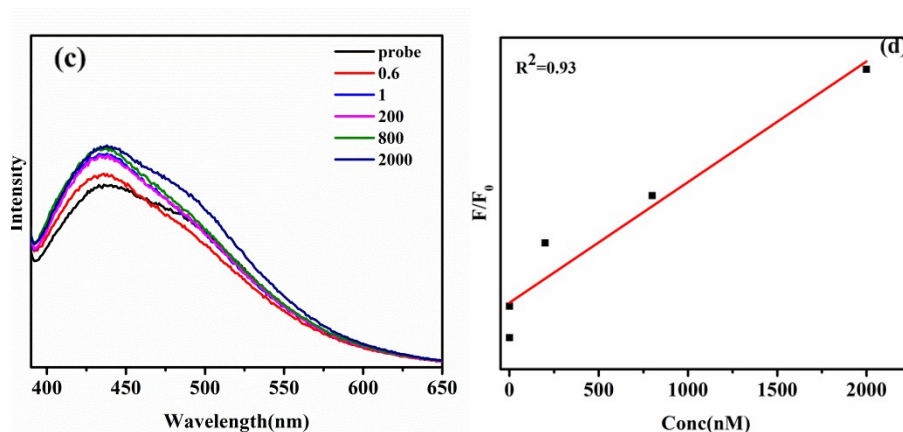

**Fig.S7** (c) PL response of CQD- $\text{N}_3$  with different conc. of compound 2, (d) Linear response of compound 2 in HEPES buffer.

Compound 3

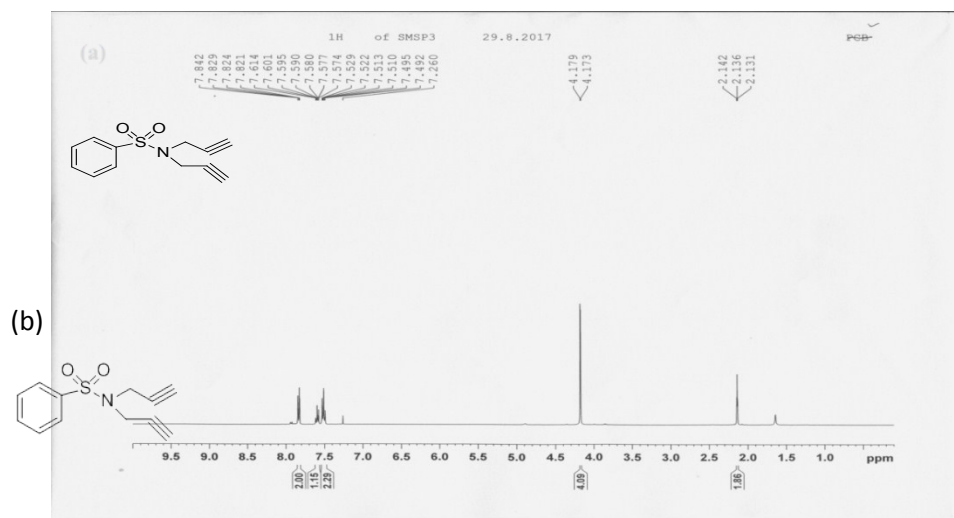

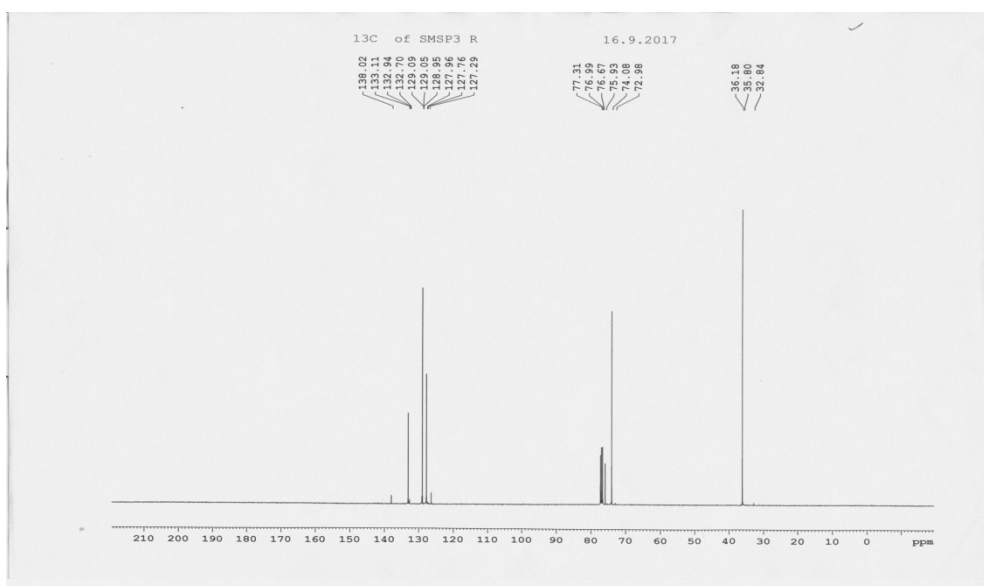

**Fig.S8** (a)  $^1\text{H}$  NMR spectra of compound 3, (b)  $^{13}\text{C}$  NMR spectra compound 3.

$^1\text{H}$  NMR (400 MHz,  $\text{CDCl}_3$ )  $\delta$  7.86 - 7.80 (m, 2H), 7.64 - 7.56 (m, 1H), 7.55 - 7.47 (m, 2H), 4.17 (d, 4H,  $J = 4$  Hz), 2.15 (t, 2H);  $^{13}\text{C}$  NMR (100 MHz,  $\text{CDCl}_3$ )  $\delta$  137.9, 133.2, 129.1, 127.8, 75.9, 74.2, 36.2. IR (ATR):  $\nu = 3268, 2119, 1446, 1337, 1159, 1089\text{ cm}^{-1}$ .

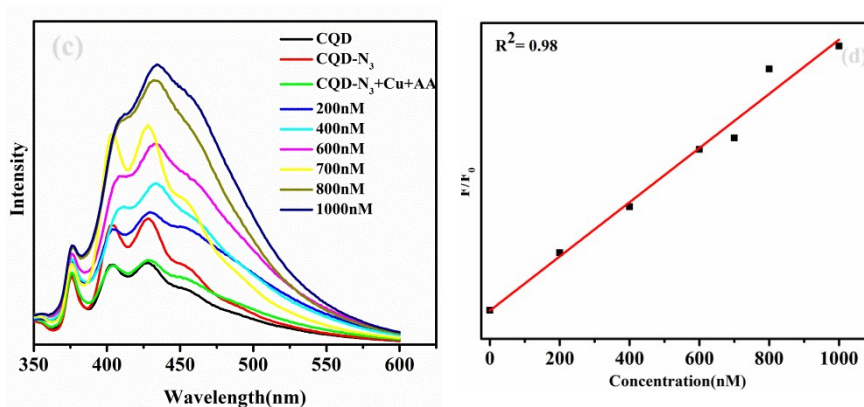

**Fig.S8** (c) PL turn on of CQD- $\text{N}_3$  with different conc. Of compound 3, (d) Linear response of compound 3 in ethanol solvent.

Compound 4

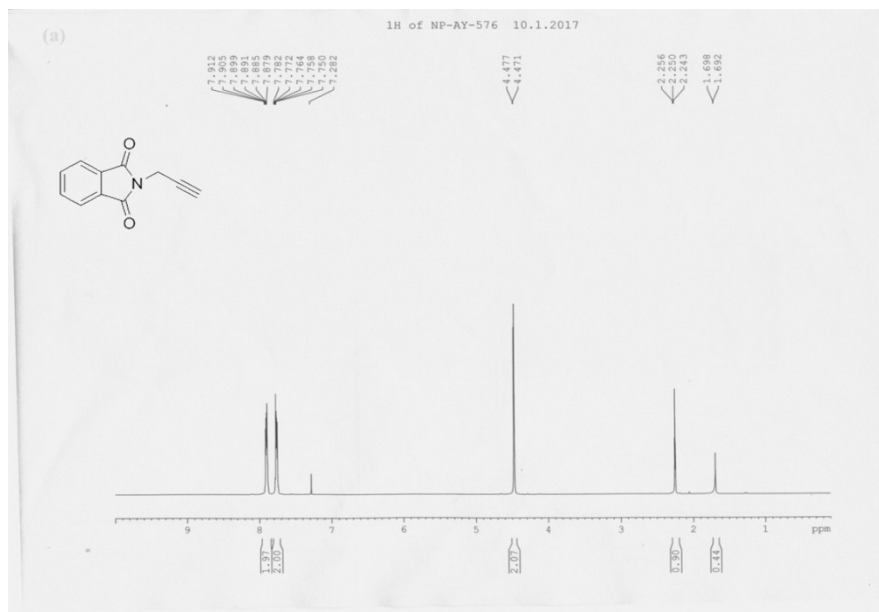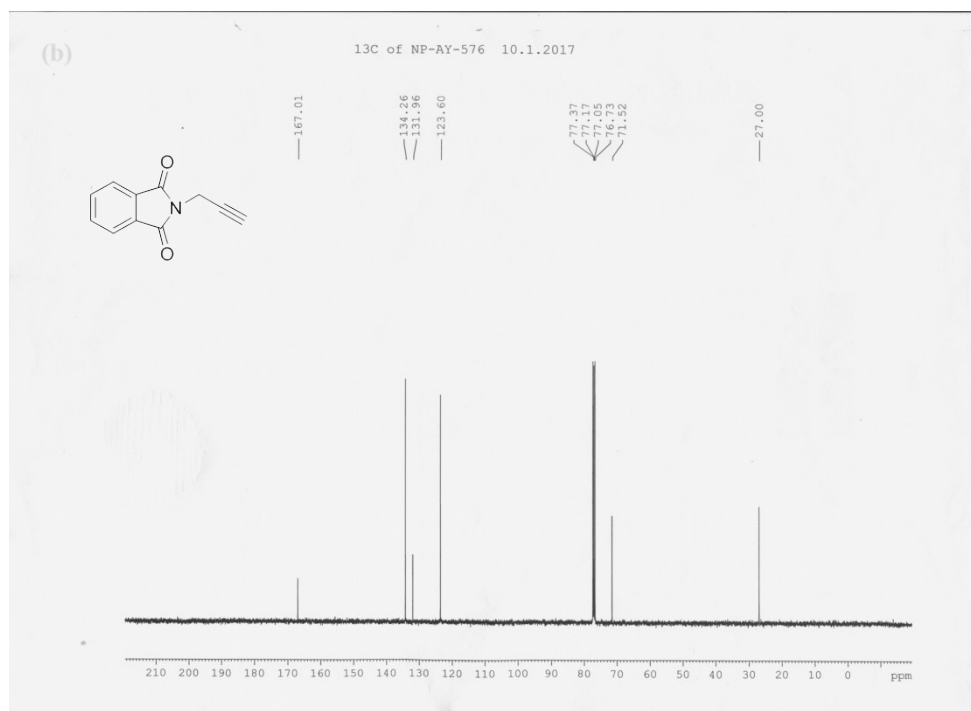

Fig.S9 (a) <sup>1</sup>H NMR spectra of compound 4, (b) <sup>13</sup>C NMR spectra compound 4.

$^1\text{H}$  NMR(400 MHz,  $\text{CDCl}_3$ )  $\delta$  7.93-7.85 (m, 2H), 7.80 -7.73 (m, 2H), 4.47 (s, 2H), 2.25 - 2.24 (t, 1H);  $^{13}\text{C}$  NMR (100 MHz,  $\text{CDCl}_3$ )  $\delta$  167.0, 134.2, 131.9, 123.6, 71.5, 27.0. IR (ATR):  $\nu$  = 3298, 2981, 1703, 1406, 1128, 940  $\text{cm}^{-1}$ .

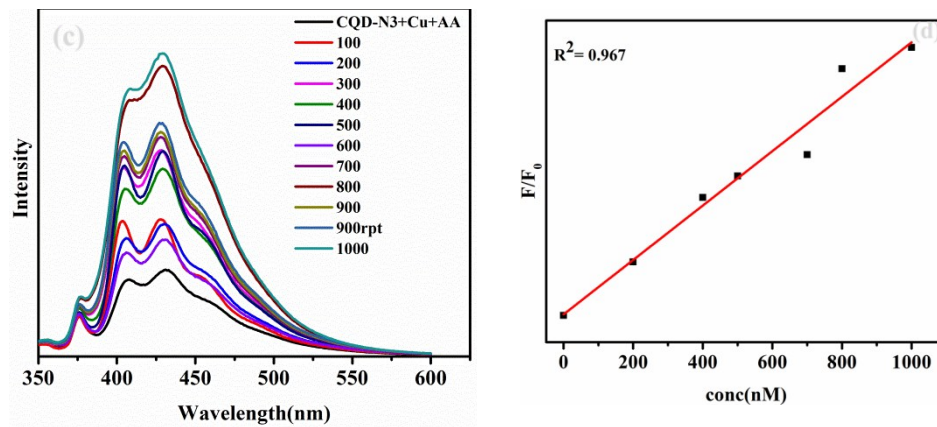

**Fig.S9** (c) PL turn on of CQD-N<sub>3</sub> with different conc. Of compound 4, (d) Linear response of compound 4 in ethanol solvent.

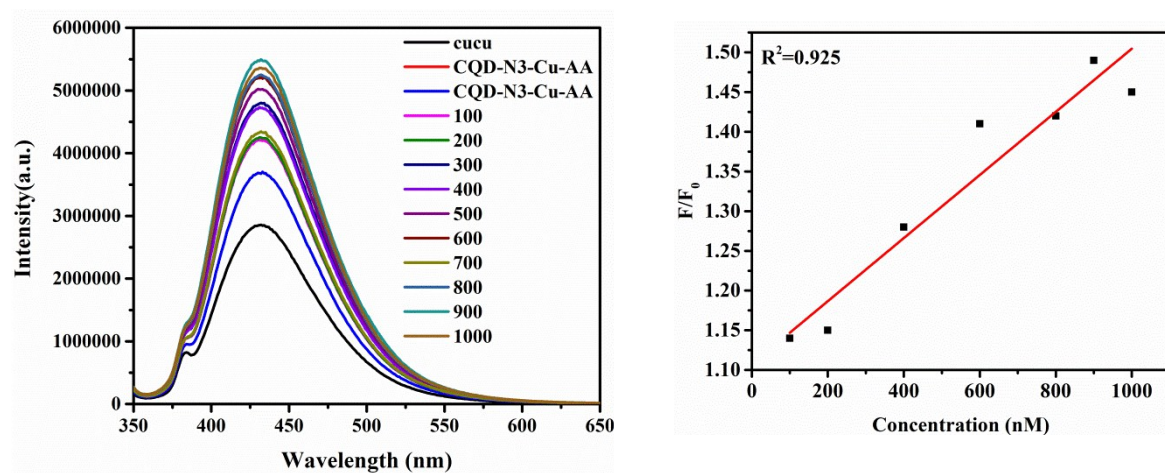

**Fig. S10** PL turn on of CQD-N<sub>3</sub> in cucumber with different conc. of FXN

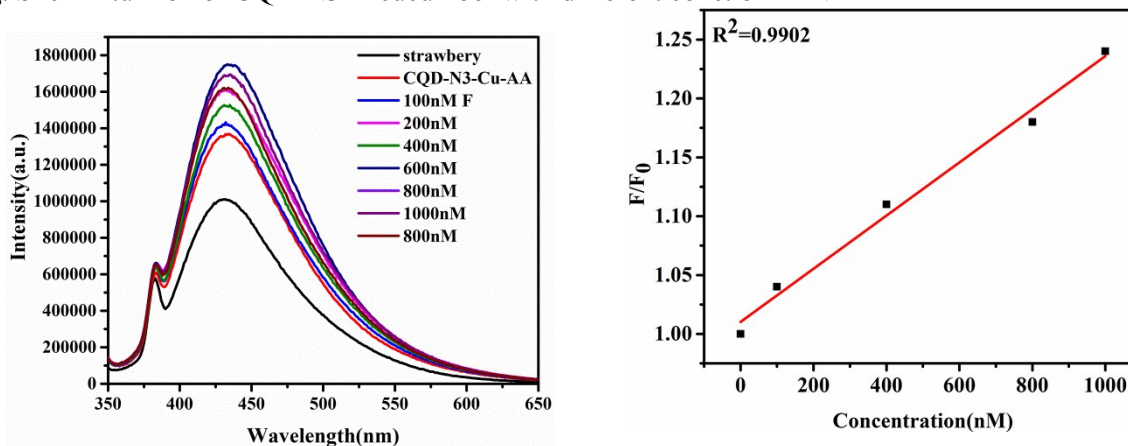



**Fig.S11** PL turn on of CQD-N3 in strawberry with different conc. of FXN

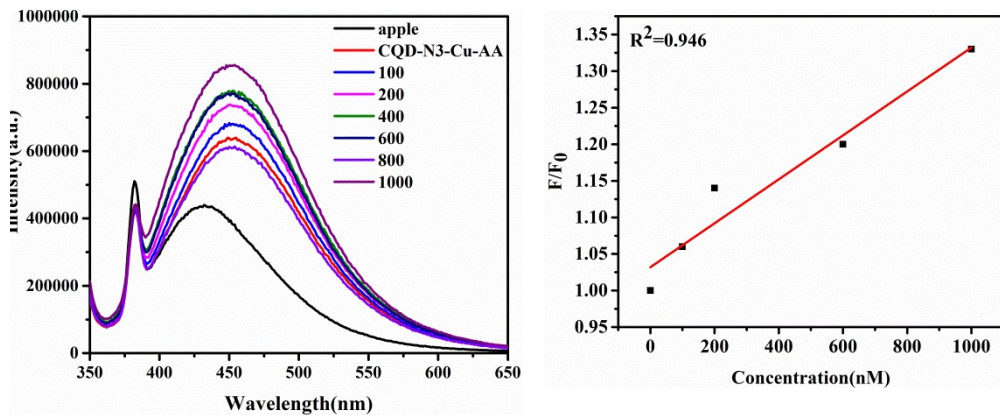

**Fig. S12** PL turn on of CQD-N3 in apple with different conc. of FXN
